# Supplementary material for: Individuality in coo calls of adult male golden snub-nosed monkeys (Rhinopithecus roxellana) living in a multilevel society
Source: PubMed Central journal article supplement (PMC6326966; doi:10.1007/s10071-018-1222-y), 2018-11-20
Supplement: 10071_2018_1222_MOESM1_ESM.pdf [file 10071_2018_1222_MOESM1_ESM.pdf]

# ANIMAL COGNITION

## Individuality in coo calls of adult male golden snub-nosed monkeys (*Rhinopithecus roxellana*) living in a multilevel society

Penglai Fan, Ruoshuang Liu, Cyril C. Grueter, Fang Li, Feng Wu, Tianpeng Huang,  
Hui Yao, Dingzhen Liu\*, Xuecong Liu\*

\* Dingzhen Liu: Key Laboratory of Biodiversity Science and Ecological Engineering  
(Ministry of Education), College of Life Sciences, Beijing Normal University, Beijing  
100875, China; dzliu@bnu.edu.cn

\* Xuecong Liu: College of Life Sciences, University of Chinese Academy of Sciences,  
Beijing 100049, China; xuecongliu@ucas.ac.cn

Table S1 Acoustic parameters (mean  $\pm$  SD) of coo calls collected from seven  
individuals of adult male *R. roxellana*

| Parameter           | Individual<br>(Number of all vocalizations, number of vocalizations used for acoustic analysis) |                    |                    |                    |                    |                    |                    |
|---------------------|-------------------------------------------------------------------------------------------------|--------------------|--------------------|--------------------|--------------------|--------------------|--------------------|
|                     | DD<br>(45, 12)                                                                                  | GE<br>(42, 16)     | HH<br>(150, 33)    | NN<br>(82, 23)     | XB<br>(207, 40)    | XZ<br>(149, 24)    | DW<br>(46, 14)     |
| Duration (s)        | 0.66 $\pm$ 0.11                                                                                 | 0.91 $\pm$ 0.09    | 0.68 $\pm$ 0.11    | 0.69 $\pm$ 0.07    | 0.77 $\pm$ 0.07    | 0.84 $\pm$ 0.18    | 0.77 $\pm$ 0.19    |
| Mean $f_0$ (Hz)     | 427.2 $\pm$ 25.9                                                                                | 522.8 $\pm$ 28.7   | 482.0 $\pm$ 52.3   | 491.8 $\pm$ 42.5   | 464.1 $\pm$ 34.1   | 526.5 $\pm$ 19.6   | 530.8 $\pm$ 40.8   |
| SD $f_0$ (Hz)       | 86.9 $\pm$ 16.3                                                                                 | 70.3 $\pm$ 19.7    | 87.5 $\pm$ 40.1    | 89.2 $\pm$ 32.3    | 80.6 $\pm$ 21.8    | 63.8 $\pm$ 28.2    | 102.5 $\pm$ 22.0   |
| Max $f_0$ (Hz)      | 559.9 $\pm$ 63.3                                                                                | 690.4 $\pm$ 51.6   | 654.9 $\pm$ 118.5  | 635.5 $\pm$ 52.2   | 639.8 $\pm$ 85.7   | 717.9 $\pm$ 81.2   | 713.4 $\pm$ 27.1   |
| Min $f_0$ (Hz)      | 232.5 $\pm$ 26.3                                                                                | 421.5 $\pm$ 56.0   | 328.8 $\pm$ 80.0   | 305.6 $\pm$ 89.1   | 284.9 $\pm$ 84.1   | 417.2 $\pm$ 94.2   | 342.7 $\pm$ 86.7   |
| Range $f_0$ (Hz)    | 327.5 $\pm$ 73.4                                                                                | 269.0 $\pm$ 59.1   | 326.1 $\pm$ 152.1  | 329.9 $\pm$ 95.9   | 354.9 $\pm$ 103.1  | 300.7 $\pm$ 134.6  | 370.6 $\pm$ 94.5   |
| Start $f_0$ (Hz)    | 513.2 $\pm$ 51.8                                                                                | 628.5 $\pm$ 53.8   | 491.4 $\pm$ 90.8   | 592.2 $\pm$ 92.3   | 563.9 $\pm$ 87.3   | 656.8 $\pm$ 73.3   | 522.0 $\pm$ 50.5   |
| End $f_0$ (Hz)      | 407.9 $\pm$ 100.6                                                                               | 619.5 $\pm$ 107.3  | 497.0 $\pm$ 196.5  | 383.6 $\pm$ 101.2  | 542.3 $\pm$ 134.0  | 580.1 $\pm$ 144.5  | 522.5 $\pm$ 91.8   |
| HNR                 | 7.7 $\pm$ 1.7                                                                                   | 14.6 $\pm$ 1.7     | 10.3 $\pm$ 2.8     | 8.0 $\pm$ 1.1      | 10.7 $\pm$ 2.4     | 12.4 $\pm$ 2.6     | 8.8 $\pm$ 1.8      |
| F <sub>1</sub> (Hz) | 1003.4 $\pm$ 69.1                                                                               | 996.9 $\pm$ 72.2   | 954.8 $\pm$ 77.8   | 1024.8 $\pm$ 122.2 | 1048.9 $\pm$ 99.4  | 1038.9 $\pm$ 93.1  | 888.8 $\pm$ 34.3   |
| F <sub>2</sub> (Hz) | 3251.9 $\pm$ 110.8                                                                              | 3094.3 $\pm$ 107.6 | 3117.2 $\pm$ 119.1 | 3414.3 $\pm$ 114.0 | 3098.8 $\pm$ 131.1 | 3091.8 $\pm$ 150.0 | 3313.4 $\pm$ 78.2  |
| F <sub>3</sub> (Hz) | 4237.8 $\pm$ 199.9                                                                              | 4168.6 $\pm$ 96.3  | 4315.5 $\pm$ 121.2 | 4652.2 $\pm$ 75.5  | 4155.4 $\pm$ 155.2 | 4191.7 $\pm$ 172.1 | 4568.1 $\pm$ 73.8  |
| F <sub>4</sub> (Hz) | 5786.7 $\pm$ 349.3                                                                              | 6147.2 $\pm$ 239.7 | 5806.5 $\pm$ 141.6 | 6068.7 $\pm$ 132.8 | 5860.6 $\pm$ 120.9 | 5888.0 $\pm$ 112.1 | 6161.2 $\pm$ 192.3 |
| $\Delta F$          | 1594.5 $\pm$ 116.8                                                                              | 1716.7 $\pm$ 73.8  | 1617.2 $\pm$ 59.3  | 1681.3 $\pm$ 62.5  | 1603.9 $\pm$ 45.8  | 1616.3 $\pm$ 52.4  | 1757.5 $\pm$ 66.9  |

Table S2 Rotated factor loadings of the acoustic parameters on first seven principal components (eigenvalues > 0.6)

| Parameters             | Principal components |       |       |       |       |       |       |
|------------------------|----------------------|-------|-------|-------|-------|-------|-------|
|                        | 1                    | 2     | 3     | 4     | 5     | 6     | 7     |
| Duration               | 0.61                 | -0.06 | -0.05 | -0.38 | 0.27  | 0.31  | 0.44  |
| Mean $f_0$             | 0.75                 | 0.10  | 0.40  | 0.28  | -0.25 | 0.00  | 0.15  |
| SD $f_0$               | 0.09                 | 0.69  | -0.65 | -0.04 | -0.06 | -0.01 | 0.03  |
| Max $f_0$              | 0.83                 | 0.35  | -0.27 | 0.18  | -0.11 | -0.05 | -0.07 |
| Min $f_0$              | 0.55                 | -0.36 | 0.65  | 0.23  | -0.21 | 0.03  | -0.03 |
| Range $f_0$            | 0.18                 | 0.58  | -0.77 | -0.05 | 0.09  | -0.07 | -0.03 |
| Start $f_0$            | 0.62                 | 0.03  | 0.01  | 0.31  | 0.35  | -0.57 | 0.03  |
| End $f_0$              | 0.78                 | 0.08  | -0.29 | 0.11  | -0.23 | 0.34  | -0.20 |
| HNR                    | 0.43                 | -0.52 | -0.10 | -0.39 | 0.21  | -0.15 | 0.23  |
| F <sub>1</sub>         | -0.04                | -0.28 | -0.14 | 0.62  | 0.63  | 0.30  | -0.10 |
| F <sub>2</sub>         | -0.36                | 0.65  | 0.25  | 0.31  | 0.04  | 0.10  | 0.38  |
| F <sub>3</sub>         | -0.23                | 0.76  | 0.37  | 0.27  | -0.05 | -0.03 | 0.18  |
| F <sub>4</sub>         | 0.21                 | 0.57  | 0.56  | -0.24 | 0.41  | 0.10  | -0.27 |
| $\Delta F$             | 0.21                 | 0.62  | 0.55  | -0.47 | 0.11  | -0.03 | -0.19 |
| Eigenvalue             | 3.41                 | 3.12  | 2.61  | 1.40  | 1.00  | 0.68  | 0.61  |
| Variance explained (%) | 24.35                | 22.31 | 18.62 | 10.01 | 7.14  | 4.87  | 4.38  |

Table S3 Structure matrix of discriminant function analysis with the first three standardized canonical discriminant functions (eigenvalues > 0.5)

| PC scores              | Discriminant functions |       |       |
|------------------------|------------------------|-------|-------|
|                        | 1                      | 2     | 3     |
| PC1                    | -0.44                  | -0.37 | 0.05  |
| PC2                    | 0.47                   | 0.32  | -0.51 |
| PC3                    | -0.88                  | 0.58  | 0.14  |
| PC4                    | 0.04                   | 0.74  | -0.23 |
| PC5                    | 0.74                   | 0.52  | 0.01  |
| PC6                    | 0.38                   | 0.65  | 0.45  |
| PC7                    | 0.36                   | -0.12 | 0.80  |
| Eigenvalue             | 2.42                   | 1.75  | 0.57  |
| Variance explained (%) | 48.5                   | 35.0  | 11.5  |
